# Supplementary material
Source: publisher figshare collection journal article supplement (https://gsajournals.figshare.com/ndownloader/files/15051578)
Supplement: Supplementary file 1 [file 15051578]

## Sheet: Table S8
Table S8. Enriched GO terms identified in upregulated genes in trametinib-treated versus vehicle-treated tg melanoma medaka.
Database	Name	ID	fold enrichment; p-val
biological process	alpha-beta T cell activation involved in immune response	GO:0002287	O=2;E=0.06;R=33.10;rawP=0.0016
	ovulation from ovarian follicle	GO:0001542	O=2;E=0.02;R=93.78;rawP=0.0002
	negative regulation of response to external stimulus	GO:0032102	O=3;E=0.23;R=13.29;rawP=0.0014
	regulation of response to external stimulus	GO:0032101	O=5;E=0.67;R=7.48;rawP=0.0005
	CD4-positive, alpha-beta T cell differentiation involved in immune response	GO:0002294	O=2;E=0.06;R=35.17;rawP=0.0015
	regulation of the force of heart contraction	GO:0002026	O=2;E=0.04;R=48.93;rawP=0.0008
	T-helper cell differentiation	GO:0042093	O=2;E=0.06;R=35.17;rawP=0.0015
	tissue remodeling	GO:0048771	O=3;E=0.22;R=13.61;rawP=0.0013
	nucleotide salvage	GO:0043173	O=2;E=0.02;R=80.38;rawP=0.0003
	ribonucleoside monophosphate biosynthetic process	GO:0009156	O=2;E=0.06;R=32.15;rawP=0.0017
cellular component	extracellular region part	GO:0044421	O=5;E=1.80;R=2.77;rawP=0.0314
	extracellular space	GO:0005615	O=4;E=1.41;R=2.85;rawP=0.0495
	neuron projection	GO:0043005	O=3;E=1.07;R=2.81;rawP=0.0896
	mitochondrial envelope	GO:0005740	O=2;E=0.87;R=2.30;rawP=0.2158
	mitochondrial membrane	GO:0031966	O=2;E=0.83;R=2.40;rawP=0.2025
molecular function	hormone activity	GO:0005179	O=2;E=0.19;R=10.59;rawP=0.0152
	tetrapyrrole binding	GO:0046906	O=2;E=0.24;R=8.46;rawP=0.0231
	heme binding	GO:0020037	O=2;E=0.22;R=9.04;rawP=0.0204
	growth factor activity	GO:0008083	O=2;E=0.28;R=7.17;rawP=0.0314
	cytokine receptor binding	GO:0005126	O=2;E=0.36;R=5.49;rawP=0.0509
	transferase activity, transferring glycosyl groups	GO:0016757	O=2;E=0.45;R=4.42;rawP=0.0746
	carbohydrate binding	GO:0030246	O=2;E=0.46;R=4.37;rawP=0.0761
	structural molecule activity	GO:0005198	O=3;E=1.06;R=2.84;rawP=0.0869
